# Supplementary material for: Downregulation of ZC3H13 by miR-362-3p/miR-425-5p is associated with a poor prognosis and adverse outcomes in hepatocellular carcinoma
Source: publisher site journal article supplement (doi:10.18632/aging.203939), 2022-03-12
Supplement: Supplementary file [file aging-v14i5-203939-supplementary-material-SD1.pdf]

SUPPLEMENTARY FIGURES

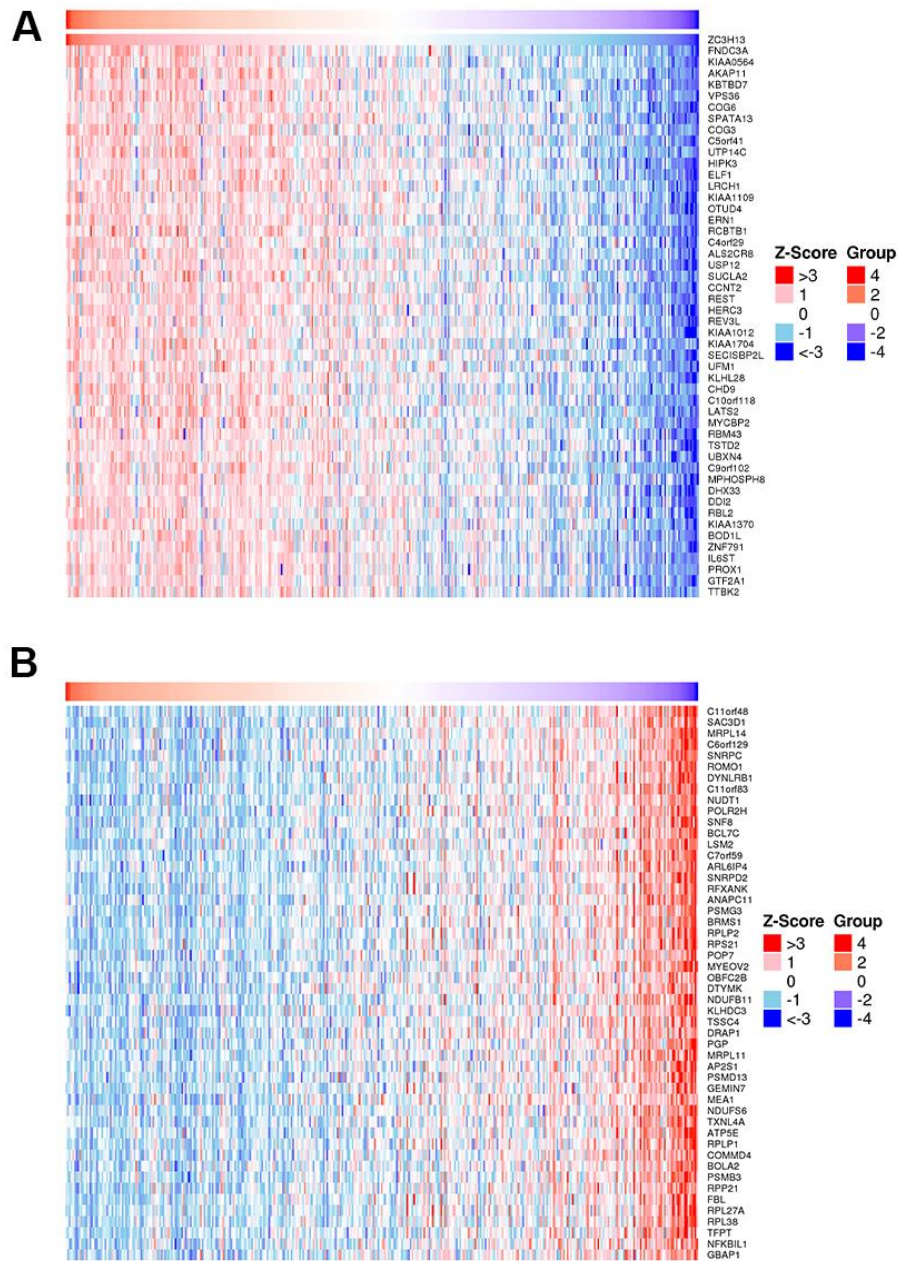

Supplementary Figure 1. (A, B) Heatmaps showing the top 50 genes positively and negatively correlated with ZC3H13 in LIHC.

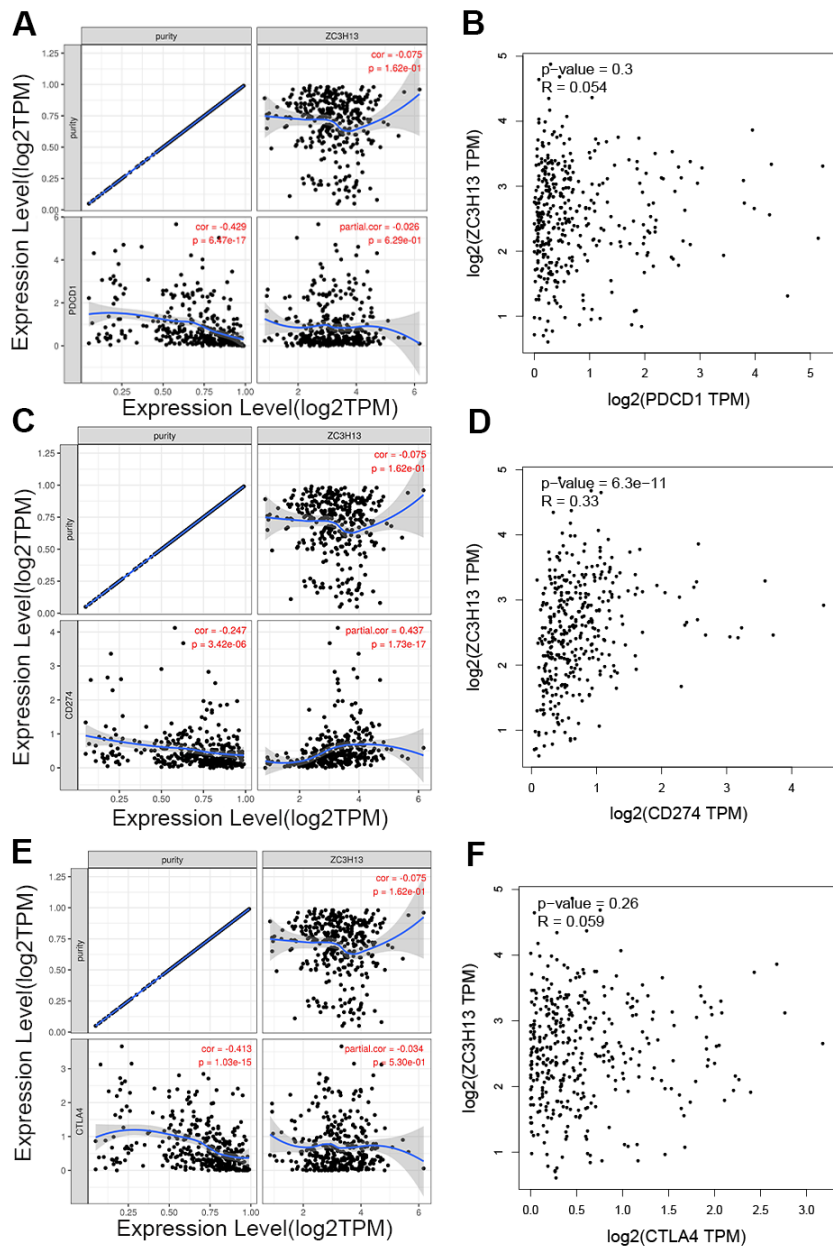

**Supplementary Figure 2. Correlation of ZC3H13 expression with PD-1, PD-L1, and CTLA-4 expression in HCC.** (A) Spearman correlation of ZC3H13 with the expression of PD-1 in HCC adjusted by purity using TIMER. (B) The expression correlation of ZC3H13 with PD-1 in HCC determined by the GEPIA database. (C) Spearman correlation of ZC3H13 with the expression of PD-L1 in HCC adjusted by purity using TIMER. (D) The expression correlation of ZC3H13 with PD-L1 in HCC determined by the GEPIA database. (E) Spearman correlation of ZC3H13 with the expression of CTLA-4 in HCC adjusted by purity using TIMER. (F) The expression correlation of ZC3H13 with CTLA-4 in HCC determined by the GEPIA database.

**Binding Site of hsa-miR-362-3p on ZC3H13:**

Show 10 entries

| BindingSite                | Class | Alignment                                                                                           |
|----------------------------|-------|-----------------------------------------------------------------------------------------------------|
| chr13:46537300-46537305[-] | 6mer  | Target: 5' cuAUUACUU-AAUCUGUGUGUu 3'<br>                   <br>miRNA : 3' acUUAGGAACUUAUCCACACaA 5' |

**Binding Site of hsa-miR-362-3p on ZC3H13:**

Show 10 entries

| BindingSite                | Class | Alignment                                                                                         |
|----------------------------|-------|---------------------------------------------------------------------------------------------------|
| chr13:46537403-46537410[-] | 8mer  | Target: 5' caucuacccaAAUGCAGGUGUGUa 3'<br>             <br>miRNA : 3' acuuaggaacUUA--UCCACACaA 5' |

**Binding Site of hsa-miR-425-5p on ZC3H13:**

Show 10 entries

| BindingSite                | Class   | Alignment                                                                                             |
|----------------------------|---------|-------------------------------------------------------------------------------------------------------|
| chr13:46537291-46537297[-] | 7mer-m8 | Target: 5' uuAAUCUGUGUGUAGUGUCAUc 3'<br>  :                  <br>miRNA : 3' agUUGCCUCACUAGCACAGUAa 5' |

Supplementary Figure 3. The binding site of miR-362/miR-425 to ZC3H13 was determined by the starBase database.
